# Supplementary material
Source: Springer Nature journal article supplement (https://www.springerprofessional.de/resource/supplementary/13638_2011_347_MOESM8_ESM.pdf/11897654)

## The Stability of IBRC

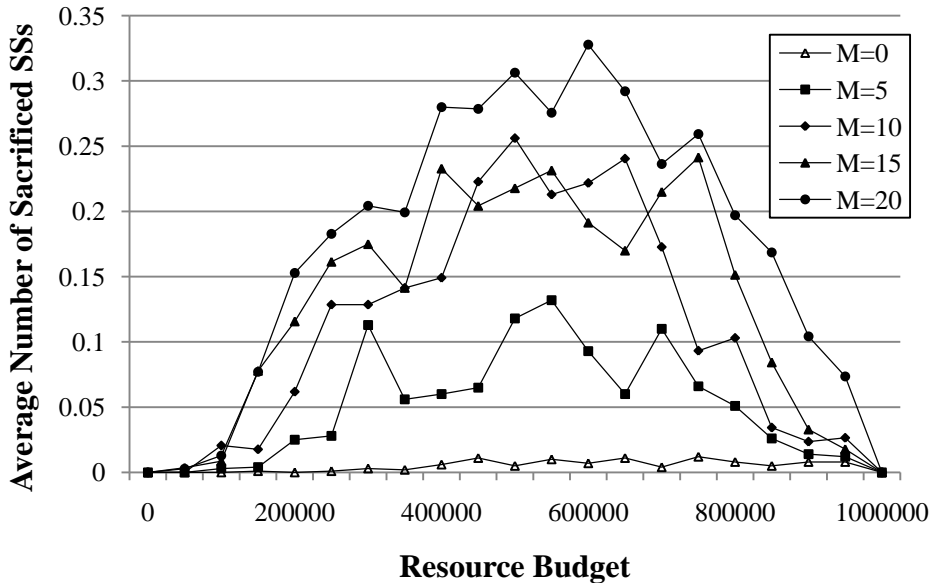

Supplement: MOESM8 [file 11897654]
